# Supplementary material
Source: MDPI journal article supplement (https://www.mdpi.com/2073-4395/9/9/546)
Supplement: s1 [file s1]

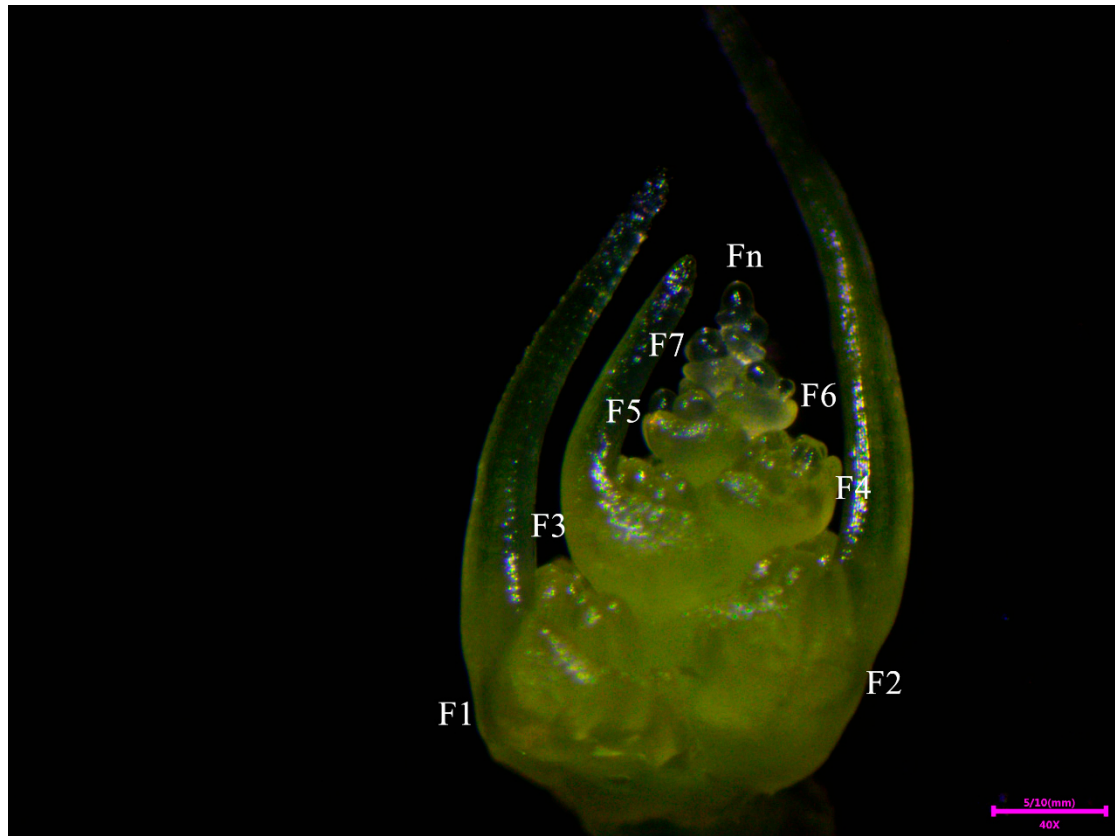

**Figure S1.** Floret positions in spikelet 9. Floret 1, floret 2, floret 3, floret 4 and floret n are represented by F1, F2, F3, F4 and Fn, respectively.
